# Supplementary material
Source: publisher figshare collection journal article supplement (https://acs.figshare.com/ndownloader/files/4933390)
Supplement: Supplementary file 1 [file 4933390]

## Sheet: Supplementary Table S-5
Supplementarty Table S-5. Protein numbers in GO terms: biological processes and GO terms: cellular components.
Biological Processes
Terms	p-value	Benjamini-Hochberg	Total protein #	WD1		WD22
				Up-regulated	Down-regulated	Up-regulated	Down-regulated
Signaling cascade	5.2e-05	1.7e-05	133	9	3	1	4
Vesicle-mediated transport	1.7e-25	2e-22	117	5	2	0	1
Oxidation reduction	1.1e-12	1.9e-10	114	13	2	0	2
Phosphorylation	5.3e-05	0.0011	100	6	2	2	2
Cytoskeleton organization	2.6e-11	2.3e-09	70	5	5	0	3
Synaptic transmission	2.2e-18	1.3e-15	67	7	0	0	2
Behavior	0.00032	0.0056	63	10	1	2	2
Cell morphogenesis	2.9e-06	7.7e-05	60	3	3	0	2
Apoptosis	0.029	0.25	47	5	0	0	0
Glucose metabolism	1.1e-07	4.5e-06	41	4	0	0	1
Protein folding	7.5e-12	8.3e-10	40	4	0	0	0
Oxidative stress	3.9e-05	0.00086	36	3	3	0	1
Neurotransmitter metabolism	4.7e-15	1.1e-12	36	3	0	0	1
Cellular Components
Terms	p-value	Benjamini-Hochberg	Total protein #	WD1		WD22
				Up-regulated	Down-regulated	Up-regulated	Down-regulated
Plasma membrane	3.5e-10	4e-09	335	22	7	3	5
Cytosol	7.9e-78	4.6e-75	326	24	8	4	8
Mitochondrion	5.9e-43	1.1e-40	286	27	5	0	1
Organelle membrane	1.4e-35	1.4e-33	224	17	5	1	1
Cytoskeleton	2.3e-22	6.1e-21	194	13	5	1	2
Cell Projection	1.6e-27	5e-26	174	14	7	1	4
Vesicle	8.8e-31	5.7e-29	165	11	4	0	4
Synapse	9.5e-30	3.9e-28	119	11	2	1	3
Golgi apparatus	4.3e-06	3.3e-05	107	5	1	2	0
Endoplasmic reticulum	0.0046	0.023	104	3	3	1	2
Ribonucleoprotein complex	0.00042	0.0026	78	2	0	0	1
Dendrite	4.8e-14	7.2e-13	66	3	1	1	1
Ribosome	0.012	0.052	49	2	0	0	1
